# Supplementary material for: Differential regulation of flower transpiration during abiotic stress in annual plants
Source: PubMed Central journal article supplement (PMC9323482; doi:10.1111/nph.18162), 2022-05-12
Supplement: NPH-235-611-s001.pdf [file NPH-235-611-s001.pdf]

## **New Phytologist Supporting Information**

**Article title:** Differential regulation of flower transpiration during abiotic stress in annual plants.

**Authors:** Sinha, Ranjita; Zandalinas , Sara; Fichman, Yosef; Sen, Sidharth ; Zeng, Shuai; Gomez-Cadenas, Aurelio; Joshi, Trupti ; Fritschi, Felix; Mittler, Ron

**Article acceptance date:** April 7, 2022

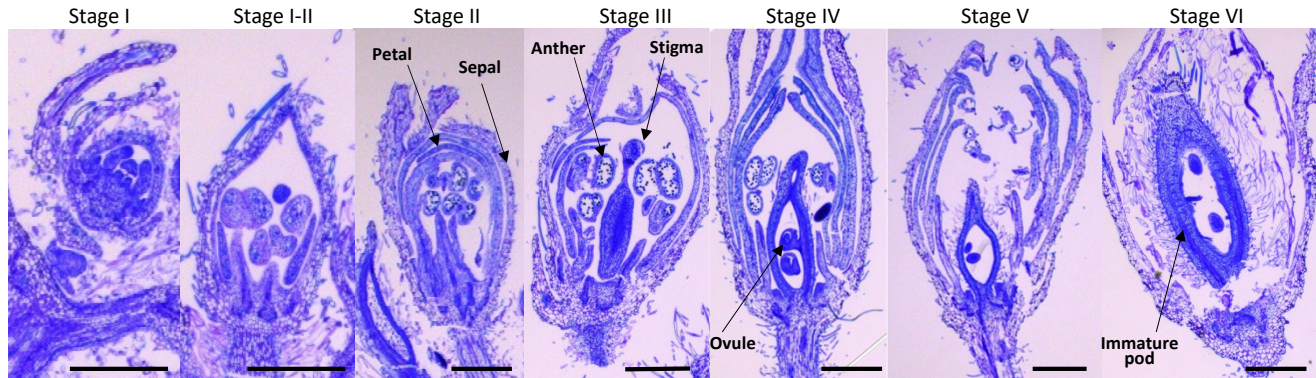

**Fig. S1** Cross-section light microscopy analysis of fixed and embedded soybean (*Glycine max*) flowers from plants grown under controlled growth conditions. Bar = 500  $\mu$ M.

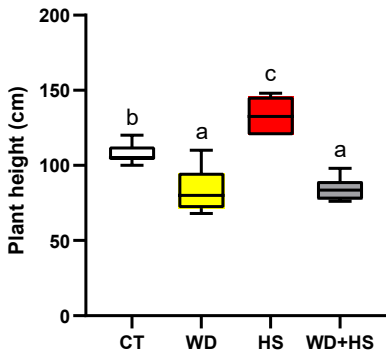

**Fig. S2** Height of soybean (*Glycine max*) plants grown under control (CT), water deficit (WD), heat stress (HS), and WD+HS. Height measurements were taken 25 days post stress application. All experiments were conducted with 3 biological repeats, each with 15 plants as technical repeats. Results are shown as box-and-whisker plots with borders corresponding to the 25<sup>th</sup> and 75<sup>th</sup> percentiles of the data. Different letters denote significance at  $P < 0.05$  (ANOVA followed by a Tukey's post hoc test). Abbreviations: CT, control; HS, heat stress; WD, water deficit.

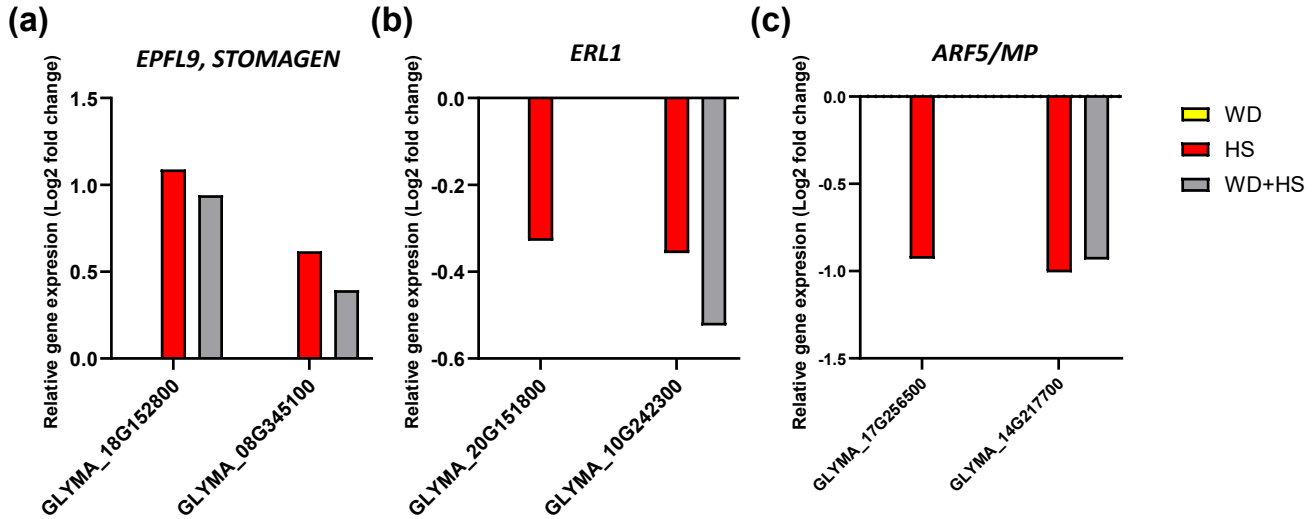

**Fig. S3** Expression of transcripts involved in stomatal development in flowers from soybean (*Glycine max*) plants grown under control (CT), water deficit (WD), heat stress (HS), or WD+HS. *STOMAGEN* (*EPFL9*) that is upregulated (a) is known to drive a higher number of stomata, while *ERECTA-LIKE1* (*ERL1*) (b) and *ARF5/MP* (c) that are downregulated, are known to suppress the number of stomata forming on leaves (Sugano et al., 2010; Zhang et al., 2014; Qi et al., 2020). Expression level is relative to CT. Expression data was obtained from the RNA-Seq analysis.

Qi X, Yoshinari A, Bai P, Maes M, Zeng SM, Torii KU. 2020. The manifold actions of signaling peptides on subcellular dynamics of a receptor specify stomatal cell fate. *Elife* 9: e58097

Sugano SS, Shimada T, Imai Y, Okawa K, Tamai A, Mori M, Hara-Nishimura I. 2010. Stomagen positively regulates stomatal density in *Arabidopsis*. *Nature* 463: 241-244

Zhang JY, He SB, Li L, Yang HQ. 2014. Auxin inhibits stomatal development through MONOPTEROS repression of a mobile peptide gene *STOMAGEN* in mesophyll. *Proc Natl Acad Sci U S A*. 111: E3015-23

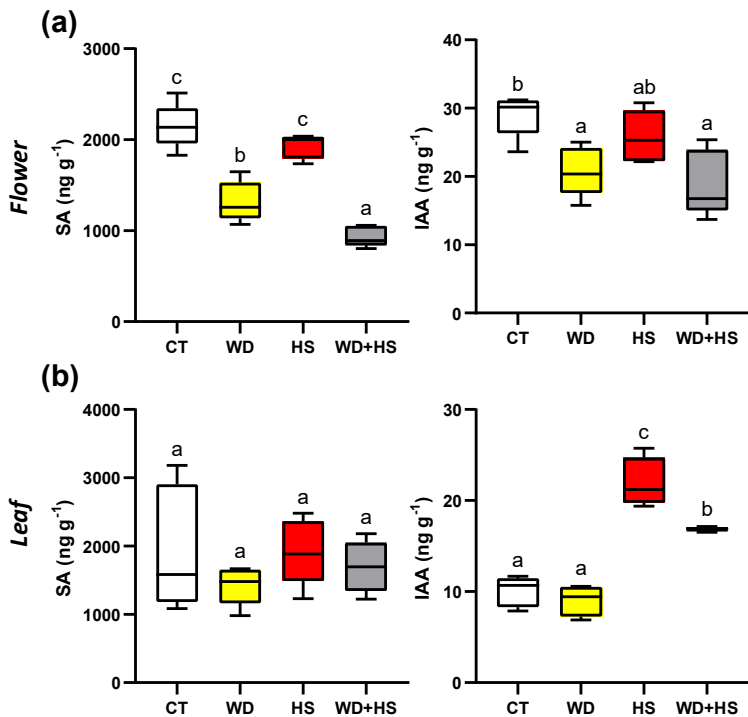

**Fig. S4** Accumulation of SA and IAA in flowers (a) and leaves (b) from soybean (*Glycine max*) plants subjected to heat stress or a combination of water deficit and heat stress. All experiments were conducted with 3 biological repeats, each with 15 plants as technical repeats. Results are shown as box-and-whisker plots with borders corresponding to the 25<sup>th</sup> and 75<sup>th</sup> percentiles of the data. Different letters denote significance at  $P < 0.05$  (ANOVA followed by a Tukey's post hoc test). Abbreviations: CT, control; HS, heat stress; WD, water deficit.

## Supplementary Table 1: List of primers used for RT-PCR

| <b>Gene name</b> | <b>Forward primer</b>              | <b>Reverse Primer</b>             |
|------------------|------------------------------------|-----------------------------------|
| EF1-alpha        | 5'-GACCTTCTTCGTTTCTCGCA-3'         | 5'-CGAACCTCTCAATCACACGC-3'        |
| DREB1B;1         | 5'- GTAAAGATTGTTTCGTATGGGACAAG -3' | 5'- ACACCTAAAATGAGCAACCGTACTA -3' |
| DREB1H;1         | 5'- ATTAGCCGCAAAAGTAAGTCTACG -3'   | 5'- TGTGCCACTAGTACTGTTGATCAC -3'  |
| APX1             | 5'-TCACGGAGTTGTTGAGTGGT-3'         | 5'- CCTCAGCGTAATCAGCAAAG-3'       |
